# Supplementary material for: Self-standing Bi2O3 nanoparticles/carbon nanofiber hybrid films as a binder-free anode for flexible sodium-ion batteries
Source: Royal Society of Chemistry journal article supplement (doi:10.1039/c7qm00128b), 2017-01-01
Supplement: c7qm00128b1.pdf [file c7qm00128b1.pdf]

## Supplementary Information

### **Self-Standing Bi<sub>2</sub>O<sub>3</sub> Nanoparticles/Carbon Nanofiber Composite Film as a Binder-Free Anode for Flexible Sodium Ion Batteries**

Hong Yin,<sup>†</sup> Xiang-Xiang Yu,<sup>†</sup> Ming-Lei Cao,<sup>†</sup> Han Zhao, Yan Shen, Chong Li,<sup>\*</sup> Ming-  
Qiang Zhu<sup>†\*</sup>

Wuhan National Laboratory for Optoelectronics (WNLO), School of Optics and  
Electronic Information, Huazhong University of Science and Technology, Wuhan  
430074, China.

<sup>†</sup> These authors contributed equally to this work.

<sup>\*</sup> Corresponding Authors

E-mail: mqzhu@hust.edu.cn

The carbon nanofibers are prepared by paralyzing the PAN fibers at 700 °C for 6h in Ar.

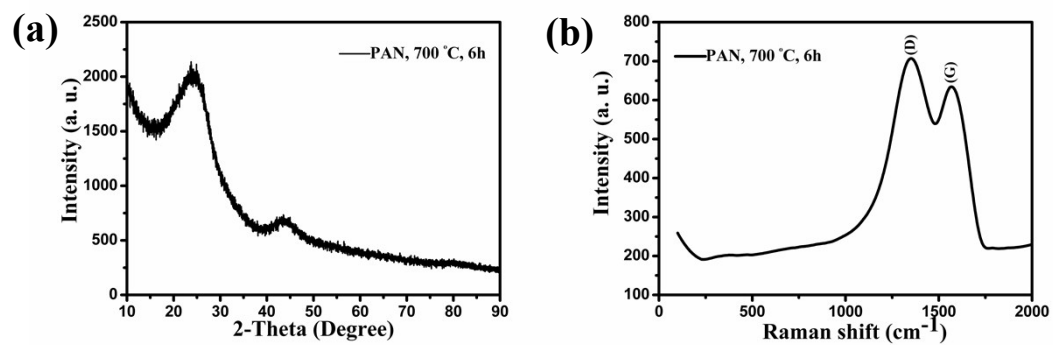

**Fig. S1** (a) XRD patterns of the carbon nanofibers. (b) Raman spectra of the carbon nanofibers.

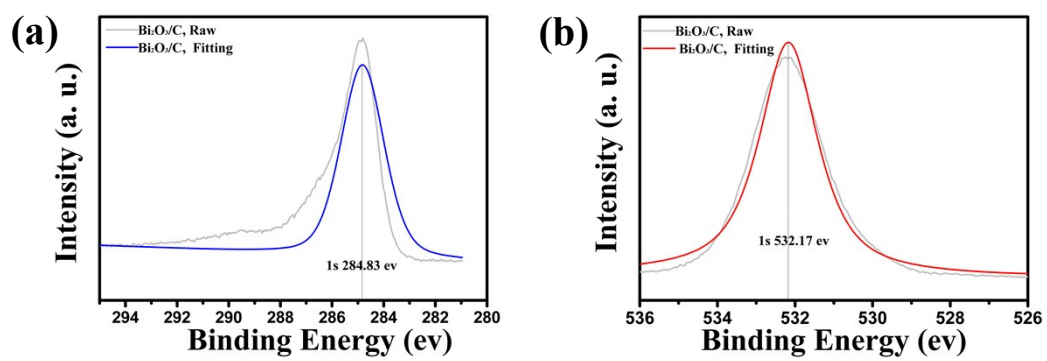

**Fig. S2** (a) and (b) XPS spectra of carbon and oxygen for  $\text{Bi}_2\text{O}_3/\text{C}$ , respectively.

The  $\text{Bi}_2\text{O}_3/\text{C}$  (Bare) was prepared by pyrolyzed the  $\text{PAN}/\text{Bi}(\text{NO}_3)_3$  precursor at  $700^\circ\text{C}$  for 6 h in Ar and then oxidation at  $350^\circ\text{C}$  for 3 h in Air. The  $\text{Bi}_2\text{O}_3$  nanoparticles stick on the surface of carbon nanofibers and few nanoparticles embed in the carbon nanofibers (**Figure S3 a, b**).

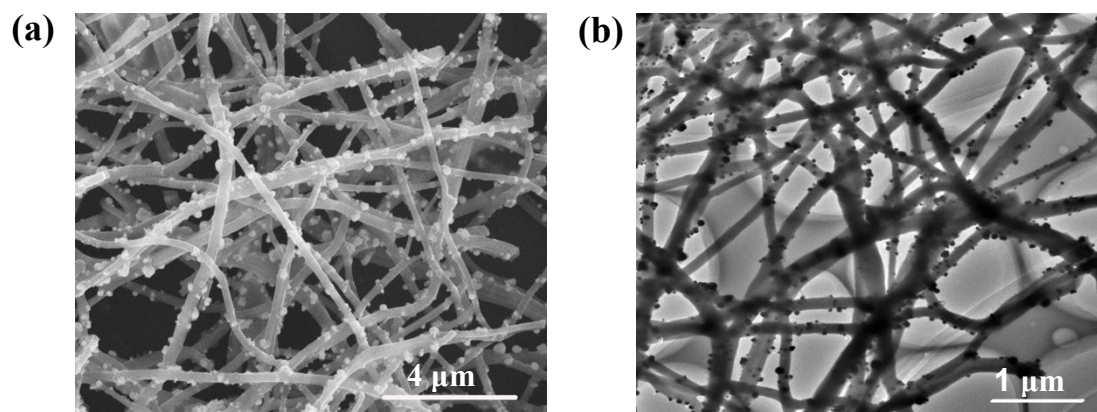

**Fig. S3** (a) and (b), SEM and TEM images of  $\text{Bi}_2\text{O}_3/\text{C}$  (Bare).

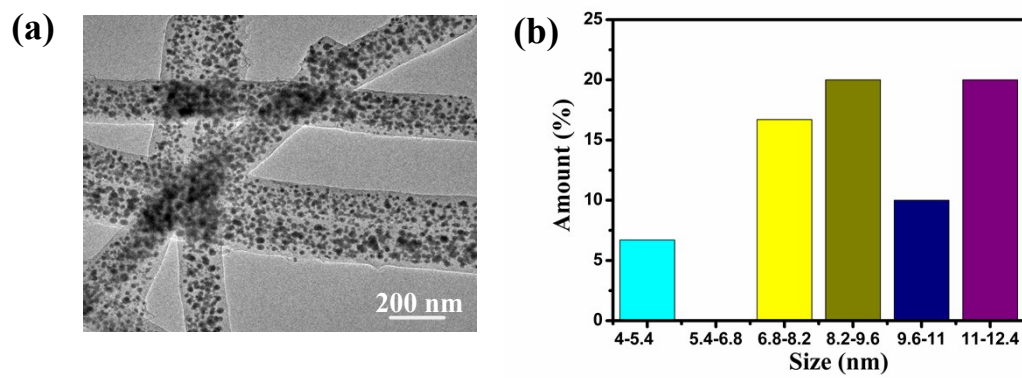

**Fig. S4** (a) TEM image of  $\text{Bi}_2\text{O}_3/\text{C}$ . (b) The size distribution of  $\text{Bi}_2\text{O}_3$  in carbon nanofibers.

The Bi nanoparticles embedded in carbon nanofibers is about 18 wt% by the TGA-DSC curves (Fig. S5 a). The Bi<sub>2</sub>O<sub>3</sub> nanoparticles embedded in carbon nanofibers is about 48 wt% by the TGA-DSC curves (Fig. S5 b).

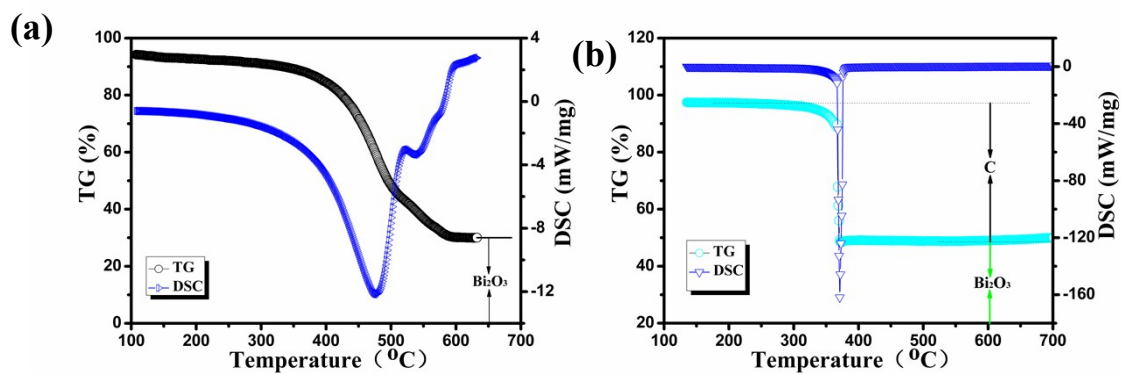

Fig. S5 (a) TGA-DSC curves of Bi/C in air. (b) TGA-DSC curves of Bi<sub>2</sub>O<sub>3</sub>/C in air.

The  $\text{Bi}_2\text{O}_3$  nanoparticles content vs. different concentration in precursor solution ( $\text{BiCl}_3$ , PAN and DMF).

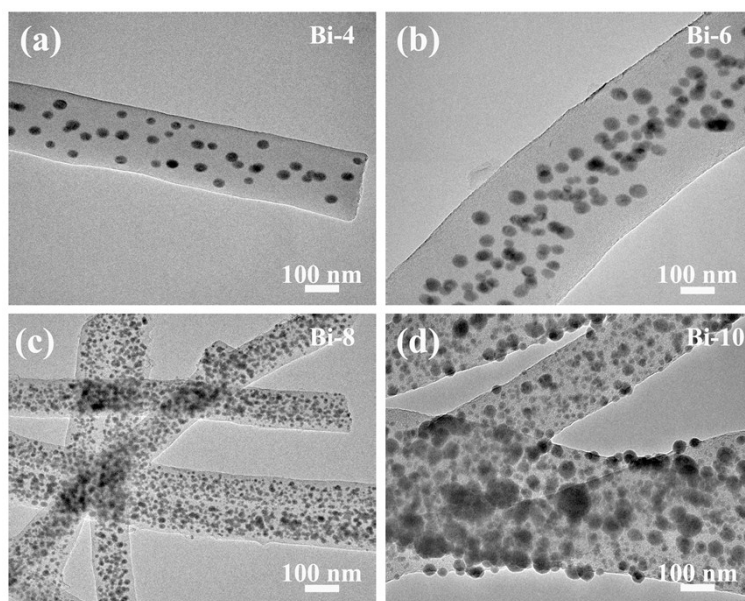

**Fig. S6** TEM images of  $\text{Bi}_2\text{O}_3/\text{C}$  nanofibers at  $\text{BiCl}_3$  feed concentration of (a), Bi-4, (b) Bi-6, (c) Bi-8 and (d) Bi-10.

**Table S1** Bi<sub>2</sub>O<sub>3</sub> nanoparticles content vs. different BiCl<sub>3</sub> concentration.

|                                                      |        |        |        |        |
|------------------------------------------------------|--------|--------|--------|--------|
| BiCl <sub>3</sub> concentration                      | 4 %    | 6 %    | 8 %    | 10 %   |
| Bi <sub>2</sub> O <sub>3</sub> nanoparticles content | 20 wt% | 35 wt% | 48 wt% | 59 wt% |



The Bi<sub>2</sub>O<sub>3</sub>/C (Bare) was prepared by paralyzing the PAN/Bi(NO<sub>3</sub>)<sub>3</sub> precursor at 700 °C for 6h in Ar and then oxidation at 500 °C for 3h in Air. The length of the as-prepared Bi<sub>2</sub>O<sub>3</sub>/C (Bare) is short (about 10 μm) and could not form a bind-free and flexible film (**Fig. S7 a**). The size of the Bi<sub>2</sub>O<sub>3</sub> is also exceeding 100 nm (**Fig. S7 b**).

For the preparation of anode sheets, a slurry was formed by mixing the active material (80 wt%), acetylene black (10 wt%) and binder (10 wt% polyvinylidene fluoride, PVDF, dissolved in *N*-methyl-2-pyrrolidone, NMP). Then the slurry was coated onto a copper foil current collector. The electrodes were dried under vacuum at 120 °C for 12 h and then punched and weighed. The mass loading of the electrode is about 2.98 mg/cm<sup>2</sup> and the area of electrode is 0.50 cm<sup>2</sup>. The batteries were assembled in a glove box under a high purity argon atmosphere. 1 M NaPF<sub>6</sub> in a mixture of ethylene carbonate/dimethyl carbonate (EC/DMC, 1:1 by volume) with 5% fluoroethylene carbonate (FEC) as the electrolyte, and Celgard®3501 (Celgard, LLC Corp., USA) as the separator.

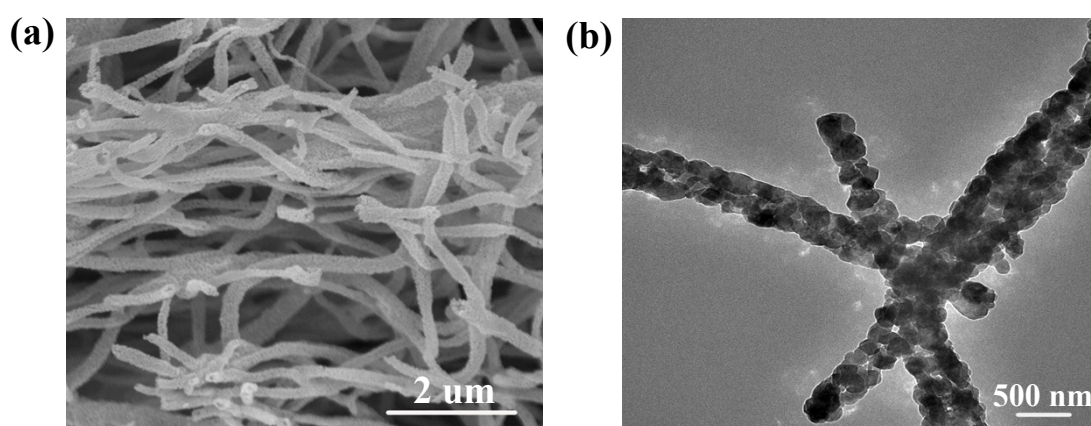

**Fig. S7** (a) and (b), SEM and TEM images of Bi<sub>2</sub>O<sub>3</sub>/C (Macroparticle).

### Depiction 1

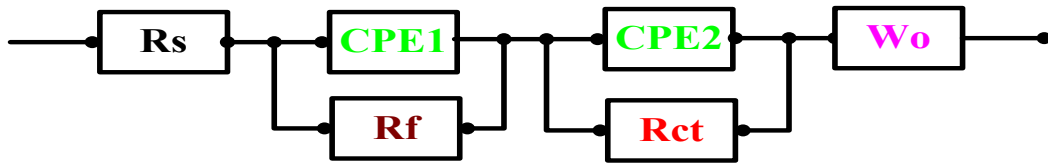

Where  $R_s$  is the solution resistance of the bulk electrolyte,  $CPE$  is Constant Phase Element,  $R_f$  is Na-ion migration resistance,  $R_{ct}$  is charge transfer resistance,  $W_o-R$  is Warburg Open Circuit Terminus impedance,  $W_o-T$  is Open Circuit Terminus T parameter values,  $W_o-P$  is Open Circuit Terminus P parameter values.

**Depiction 2** Electric conductivity & sodium ion diffusion coefficient at open circuit state,

$$D = R^2 T^2 / 2 A^2 n^4 F^4 C^2 \sigma^2 \dots (1) \quad Z_{Re} = K + \sigma \omega^{-1/2} \dots (2)$$

where  $D$  is the diffusion coefficient ( $\text{cm}^2 \text{s}^{-1}$ ),  $R$  is the gas constant ( $8.31 \text{ J mol}^{-1} \text{ K}^{-1}$ ),  $T$  is the absolute temperature ( $298 \text{ K}$ ),  $A$  is the surface area of the cathode ( $0.5 \text{ cm}^2$ ),  $n$  is the number of electrons transferred in the half-reaction for the redox couple,  $F$  is the Faraday constant ( $96485 \text{ C mol}^{-1}$ ),  $C$  is the is the molar concentration of Na-ions in  $\text{Bi}_2\text{O}_3/\text{C}$ ,  $K$  is a constant,  $\omega$  is frequency, and  $\sigma$  is the Warburg factor which corresponds to the slope of the curve shown in **Fig. 3b**.

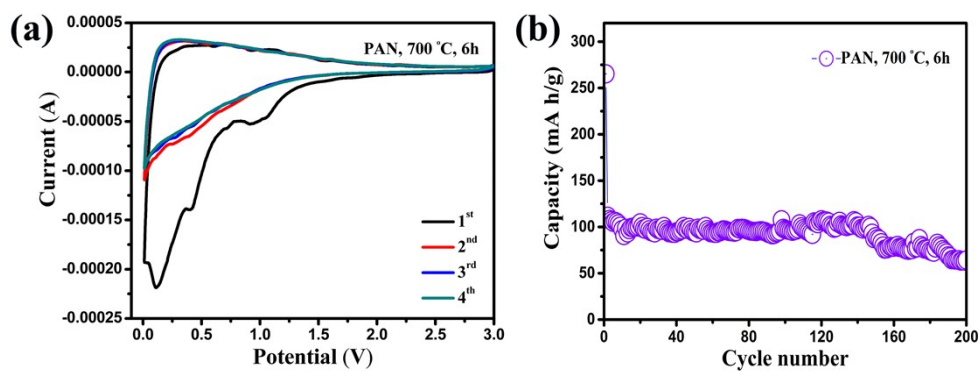

**Fig. S8** (a) CV curves of CNF anodes from 0.01 V to 3 V at a scan rate of  $0.1 \text{ mV s}^{-1}$ .  
(b) cycling performance of CNFs at a cycling rate of  $100 \text{ mA g}^{-1}$ .

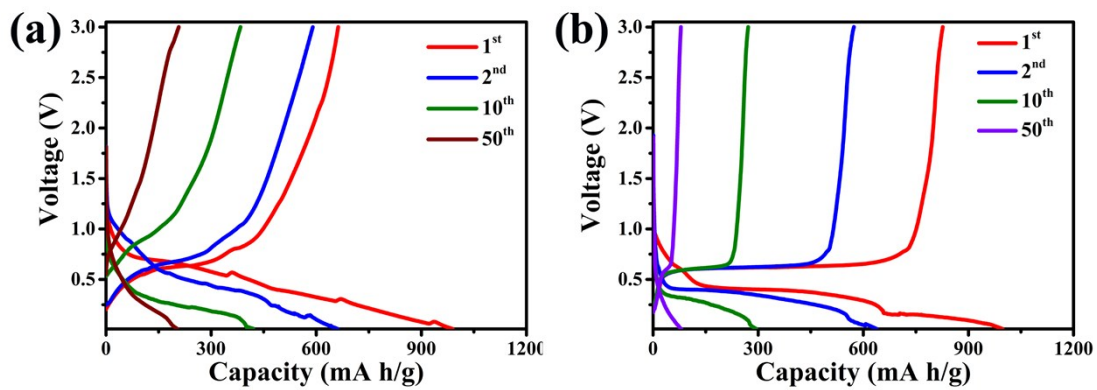

**Fig. S9** The charge and discharge voltage profiles of Bi<sub>2</sub>O<sub>3</sub>/C (Bare) and Bi<sub>2</sub>O<sub>3</sub> (Macroparticle).
